# Supplementary material
Source: PubMed Central journal article supplement (PMC6506819)
Supplement: mmc1.pdf [file mmc1.pdf]

**The American Journal of Human Genetics, Volume 104**

**Supplemental Data**

**Disease-Associated Genetic Variation  
in Human Mitochondrial Protein Import**

**Emmanuelle Nicolas, Rossella Tricarico, Michelle Savage, Erica A. Golemis, and Michael J. Hall**

## Supplemental Data

**Supplemental Table 1: Human genes with reported variants associated with defective mitochondrial import and phenotype of knockout mice.** Data for human diseases are reported with genes and phenotype entries in OMIM <https://www.omim.org/> downloaded on 12/09/2018. When the OMIM annotations are not up to date with literature, relevant publications cited in the current study are added. The data for the phenotype of the knockout mice are from <http://www.informatics.jax.org/> and presented with record IDs.

**Supplemental Table 2: Genes with variants associated with 3-MGA-uria. A.** as reported in OMIM phenotypic series [PS250950], <https://www.omim.org/phenotypicSeries/PS250950> downloaded on 12/11/2018, **B.** additional genes reported in literature.

## Supplemental References

**1: to the main text**

**2: to Supplemental Table 1**

**3: to Supplemental Table 2**

Supplemental Table 1

| Import pathway component | Gene           | Gene (MIM #) | Contribution last update | Last entry edit history | Map location             | Disease phenotype                                                                              | Phenotype (MIM #)                                | Inheritance | Knockout mouse phenotype (MGI #)                                                                                          |
|--------------------------|----------------|--------------|--------------------------|-------------------------|--------------------------|------------------------------------------------------------------------------------------------|--------------------------------------------------|-------------|---------------------------------------------------------------------------------------------------------------------------|
| Transporter machinery    | <i>AGK</i>     | 610345       | 20/06/2012               | 05/10/2016              | <a href="#">7q34</a>     | Cataract 38                                                                                    | <a href="#">614691</a>                           | AR          |                                                                                                                           |
|                          |                |              |                          |                         |                          | Sengers syndrome                                                                               | <a href="#">212350</a>                           | AR          |                                                                                                                           |
|                          | <i>DNAJC19</i> | 608977       | 18/03/2014               | 02/08/2017              | <a href="#">3q26.33</a>  | 3-methylglutaconic aciduria, type V                                                            | <a href="#">610198</a>                           | AR          |                                                                                                                           |
|                          | <i>OXA1L</i>   | 601066       | 02/06/1999               | 06/04/2010              | <a href="#">14q11.2</a>  | Not in OMIM. Supp. Ref 72 Thompson <i>et al.</i>                                               |                                                  |             |                                                                                                                           |
|                          | <i>PAM16</i>   | 614336       | 23/03/2015               | 14/04/2017              | <a href="#">16p13.3</a>  | Spondylometaphyseal dysplasia, Megarbane-Dagher-Melike type                                    | <a href="#">613320</a>                           | AR          | Embryonic or preweaning lethality (MGI:1913699)                                                                           |
|                          | <i>TIMM8A</i>  | 300356       | 20/04/2016               | 20/04/2016              | <a href="#">Xq22.1</a>   | Mohr-Tranebjaerg syndrome                                                                      | <a href="#">304700</a>                           | XLR         |                                                                                                                           |
|                          | <i>TIMM22</i>  | 607251       | 10/30/2017               | 10/30/2017              | <a href="#">17p13.3</a>  | Not in OMIM. Supp. Ref 73 Pacheu-Grau <i>et al.</i>                                            |                                                  |             | Embryonic or preweaning lethality (MGI:1929742)                                                                           |
|                          | <i>TIMM50</i>  | 607381       | 03/10/2017               | 03/10/2017              | <a href="#">19q13.2</a>  | 3-methylglutaconic aciduria, type IX                                                           | <a href="#">617698</a>                           | AR          | Preweaning lethality (MGI:1913775)                                                                                        |
| MIA pathway              |                |              |                          |                         |                          | Myopathy, isolated mitochondrial                                                               | <a href="#">616209</a>                           | AD          |                                                                                                                           |
|                          | <i>CHCHD10</i> | 615903       | 29/01/2015               | 25/10/2016              | <a href="#">22q11.23</a> | Frontotemporal dementia and/or amyotrophic lateral sclerosis 2                                 | <a href="#">615911</a>                           | AD          | Mild mitochondrial respiration, skeletal-muscle anomalies (MGI:2143558)                                                   |
|                          | <i>GFER</i>    | 600924       | 07/10/2009               | 09/10/2009              | <a href="#">16p13.3</a>  | Myopathy, mitochondrial progressive, congenital cataract, hearing loss and developmental delay | <a href="#">613076</a>                           |             | Embryonic lethality (MGI:107757)                                                                                          |
| Chaperone                | <i>HSPD1</i>   | 118190       | 13/09/2018               | 19/09/2018              | <a href="#">2q33.1</a>   | Leukodystrophy, hypomyelinating, 4<br>Spastic paraplegia 13                                    | <a href="#">612233</a><br><a href="#">605280</a> | AR<br>AD    | Embryonic lethality (MGI:96242)                                                                                           |
| Client Processing        | <i>AFG3L2</i>  | 604581       | 20/12/2016               | 05/01/2018              | <a href="#">18p11.21</a> | Spastic ataxia 5<br>Spinocerebellar ataxia 28                                                  | <a href="#">614487</a><br><a href="#">610246</a> | AR<br>AD    | Perinatal lethality (MGI:1916847)                                                                                         |
|                          | <i>CLPB</i>    | 616254       | 16/06/2015               | 02/08/2017              | <a href="#">11q13.4</a>  | 3-methylglutaconic aciduria, type VII, with cataracts, neurologic involvement and neutropenia  | <a href="#">616271</a>                           | AR          |                                                                                                                           |
|                          | <i>CLPP</i>    | 601119       | 12/06/2018               | 13/06/2018              | <a href="#">19p13.3</a>  | Perrault syndrome 3                                                                            | <a href="#">614129</a>                           | AR          | Infertility and premature death (MGI:1858213)                                                                             |
|                          | <i>HTRA2</i>   | 606441       | 03/01/2017               | 20/07/2017              | <a href="#">2p13.1</a>   | 3-methylglutaconic aciduria, type VIII                                                         | <a href="#">617248</a>                           | AR          | Parkinsonian symptoms, striatal neurons loss, spleen and thymus atrophy, failure to thrive, premature death (MGI:1928676) |
|                          | <i>LONP1</i>   | 605490       | 06/02/2015               | 09/02/2015              | <a href="#">19p13.3</a>  | CODAS syndrome                                                                                 | <a href="#">600373</a>                           | AR          | Embryonic lethality (MGI:1921392)                                                                                         |
|                          | <i>MIPEP</i>   | 602241       | 30/11/2016               | 01/12/2016              | <a href="#">13q12.12</a> | Combined oxidative phosphorylation deficiency 31                                               | <a href="#">617228</a>                           | AR          |                                                                                                                           |
|                          | <i>PITRM1</i>  | 618211       | 30/11/2018               | 30/11/2018              | <a href="#">10p15.2</a>  | Not in OMIM. Supp. Ref 74 Brunetti <i>et al.</i>                                               |                                                  |             | Preweaning lethality (MGI:1916867)                                                                                        |
|                          | <i>PMPCA</i>   | 613036       | 03/02/2016               | 12/10/2016              | <a href="#">9q34.3</a>   | Spinocerebellar ataxia, 2                                                                      | <a href="#">213200</a>                           | AR          |                                                                                                                           |
|                          | <i>PMPCB</i>   | 603131       | 03/05/2018               | 29/08/2018              | <a href="#">7q22.1</a>   | Multiple mitochondrial dysfunctions syndrome 6                                                 | <a href="#">617954</a>                           | AR          | Embryonic lethality (MGI:1920328)                                                                                         |
|                          | <i>SPG7</i>    | 602783       | 10/04/2013               | 22/07/2015              | <a href="#">16q24.3</a>  | Spastic paraplegia 7                                                                           | <a href="#">607259</a>                           | AD, AR      | Impaired motor skills (MGI:2385906)                                                                                       |
|                          | <i>XPNPEP3</i> | 613553       | 08/09/2010               | 06/09/2013              | <a href="#">22q13.2</a>  | Nephronophthisis-like nephropathy 1                                                            | <a href="#">613159</a>                           | AR          |                                                                                                                           |
|                          | <i>YME1L1</i>  | 607472       | 21/02/2018               | 21/02/2018              | <a href="#">10p12.1</a>  | Optic atrophy 11                                                                               | <a href="#">617302</a>                           | AR          | Embryonic lethality (MGI:1351651)                                                                                         |
| Lipid environment        | <i>SERAC1</i>  | 614725       | 19/02/2018               | 23/02/2018              | <a href="#">6q25.3</a>   | 3-methylglutaconic aciduria with deafness, encephalopathy, and Leigh-like syndrome             | <a href="#">614739</a>                           | AR          | Mild neurological phenotype (MGI: 2447813)                                                                                |
|                          | <i>TMEM70</i>  | 612418       | 01/07/2014               | 21/05/2015              | <a href="#">8q21.11</a>  | Mitochondrial complex V (ATP synthase) deficiency, nuclear type 2                              | <a href="#">614052</a>                           | AR          | Embryonic lethality (MGI:1915068)                                                                                         |
|                          | <i>TAZ</i>     | 300394       | 17/07/2012               | 13/07/2018              | <a href="#">Xq28</a>     | Barth syndrome                                                                                 | <a href="#">302060</a>                           | XLR         | Male infertility (MGI:109626)                                                                                             |

## Supplemental Table 2

A

| OMIM type     | Gene/locus     | Location   | Gene/locus MIM number | Phenotype MIM number | Syndrome | Inheritance |
|---------------|----------------|------------|-----------------------|----------------------|----------|-------------|
| I or MGA1     | <i>AUH</i>     | 9q22.31    | 600529                | 250950               |          | AR          |
| II or MGCA2   | <i>TAZ</i>     | Xq28       | 300394                | 302060               | Barth    | XLR         |
| III or MGCA3  | <i>OPA3</i>    | 19q13.32   | 606580                | 258501               | Costeff  | AR          |
| IV or MGCA4   | <i>MGCA1</i>   | not mapped |                       |                      |          |             |
| V or MGCA5    | <i>DNAJC19</i> | 3q26.33    | 608977                | 610198               | DCMA     | AR          |
| VI or MGCA6   | <i>SERAC1</i>  | 6q25.3     | 614725                | 614739               | MEGDEL   | AR          |
| VII or MGCA7  | <i>CLPB</i>    | 11q13.4    | 616254                | 616271               |          | AR          |
| VIII or MGCA8 | <i>HTRA2</i>   | 2p13.1     | 606441                | 617248               |          | AR          |
| IX or MGCA9   | <i>TIMM50</i>  | 19q13.2    | 607381                | 617698               |          | AR          |

B

|                                           | Gene/locus     | Location | Gene/locus MIM number | Phenotype MIM number | Syndrome | Evidence for 3-MGA-uria                   |
|-------------------------------------------|----------------|----------|-----------------------|----------------------|----------|-------------------------------------------|
| <b>TIM22 component</b>                    |                |          |                       |                      |          |                                           |
|                                           | <i>AGK</i>     | 7q34     | 610345                | 212350               | Sengers  | Supp. Ref 30<br>Mayr <i>et al.</i>        |
| <b>Complex V</b>                          |                |          |                       |                      |          |                                           |
|                                           | <i>ATPAF2</i>  | 17p11.2  | 608918                | 604273               |          | Supp. Ref 76<br>De Meirleir <i>et al.</i> |
|                                           | <i>ATP5F1D</i> | 19p13.3  | 603150                | 618120               |          | Supp. Ref 77<br>Olahova <i>et al.</i>     |
|                                           | <i>ATP5F1E</i> | 20q13.32 | 606153                | 614053               |          | Supp. Ref 75<br>Mayr <i>et al.</i>        |
| <b>Complex V assembly factor gene</b>     |                |          |                       |                      |          |                                           |
|                                           | <i>TMEM70</i>  | 8q21.11  | 612418                | 614052               |          | Supp. Ref 78<br>Spiegel <i>et al.</i>     |
| <b>Cristae junction organizing system</b> |                |          |                       |                      |          |                                           |
|                                           | <i>MICOS13</i> | 19p13.3  | 616658                |                      |          | Supp. Ref 79<br>Guarani <i>et al.</i>     |

## **Supplemental References**

### **Additional references supporting the main text**

The references were not included in the main text due to limit on number of allowed citations.

### **Introduction**<sup>1-5</sup>

1. Anderson, S., Bankier, A.T., Barrell, B.G., de Bruijn, M.H., Coulson, A.R., Drouin, J., Eperon, I.C., Nierlich, D.P., Roe, B.A., Sanger, F., et al. (1981). Sequence and organization of the human mitochondrial genome. *Nature* 290, 457-465.
2. Kim, S.J., Xiao, J., Wan, J., Cohen, P., and Yen, K. (2017). Mitochondrially derived peptides as novel regulators of metabolism. *The Journal of physiology* 595, 6613-6621.
3. McCormick, E.M., Zolkipli-Cunningham, Z., and Falk, M.J. (2018). Mitochondrial disease genetics update: recent insights into the molecular diagnosis and expanding phenotype of primary mitochondrial disease. *Current opinion in pediatrics*.
4. Stenton, S.L., and Prokisch, H. (2018). Advancing genomic approaches to the molecular diagnosis of mitochondrial disease. *Essays in biochemistry* 62, 399-408.
5. Rub, C., Wilkening, A., and Voos, W. (2017). Mitochondrial quality control by the Pink1/Parkin system. *Cell and tissue research* 367, 111-123.

### **The basic machinery for mitochondrial import.**<sup>6; 7</sup>

6. Harbauer, A.B., Zahedi, R.P., Sickmann, A., Pfanner, N., and Meisinger, C. (2014). The protein import machinery of mitochondria-a regulatory hub in metabolism, stress, and disease. *Cell metabolism* 19, 357-372.
7. Wasilewski, M., Chojnacka, K., and Chacinska, A. (2017). Protein trafficking at the crossroads to mitochondria. *Biochimica et biophysica acta* 1864, 125-137.

#### **1. Complexes mediating import of proteins to mitochondria**<sup>8-11</sup>

8. Stiller, S.B., Hopker, J., Oeljeklaus, S., Schutze, C., Schrempp, S.G., Vent-Schmidt, J., Horvath, S.E., Frazier, A.E., Gebert, N., van der Laan, M., et al. (2016). Mitochondrial OXA Translocase Plays a Major Role in Biogenesis of Inner-Membrane Proteins. *Cell metabolism* 23, 901-908.
9. Tokatlidis, K. (2005). A disulfide relay system in mitochondria. *Cell* 121, 965-967.
10. Craig, E.A. (2018). Hsp70 at the membrane: driving protein translocation. *BMC biology* 16, 11.
11. Mai, N., Chrzanowska-Lightowlers, Z.M., and Lightowlers, R.N. (2017). The process of mammalian mitochondrial protein synthesis. *Cell and tissue research* 367, 5-20.

#### **2. Mitochondrial targeting sequence (MTS)**<sup>12-18</sup>

12. Edman, P., and Begg, G. (1967). A protein sequenator. *European journal of biochemistry* 1, 80-91.

13. von Heijne, G. (1986). Towards a comparative anatomy of N-terminal topogenic protein sequences. *Journal of molecular biology* 189, 239-242.
14. von Heijne, G. (1986). Mitochondrial targeting sequences may form amphiphilic helices. *The EMBO journal* 5, 1335-1342.
15. Yeom, J., Ju, S., Choi, Y., Paek, E., and Lee, C. (2017). Comprehensive analysis of human protein N-termini enables assessment of various protein forms. *Scientific reports* 7, 6599.
16. Yamamoto, H., Itoh, N., Kawano, S., Yatsukawa, Y., Momose, T., Makio, T., Matsunaga, M., Yokota, M., Esaki, M., Shodai, T., et al. (2011). Dual role of the receptor Tom20 in specificity and efficiency of protein import into mitochondria. *Proceedings of the National Academy of Sciences of the United States of America* 108, 91-96.
17. Vaca Jacome, A.S., Rabilloud, T., Schaeffer-Reiss, C., Rompais, M., Ayoub, D., Lane, L., Bairoch, A., Van Dorsselaer, A., and Carapito, C. (2015). N-terminome analysis of the human mitochondrial proteome. *Proteomics* 15, 2519-2524.
18. Kalef-Ezra, E., Kotzamani, D., Zaganas, I., Ktrakili, N., Plaitakis, A., and Tokatlidis, K. (2016). Import of a major mitochondrial enzyme depends on synergy between two distinct helices of its presequence. *The Biochemical journal* 473, 2813-2829.

### 3. Transport-associated protein processing<sup>19-22</sup>

19. Falkevall, A., Alikhani, N., Bhushan, S., Pavlov, P.F., Busch, K., Johnson, K.A., Eneqvist, T., Tjernberg, L., Ankarcrona, M., and Glaser, E. (2006). Degradation of the amyloid beta-protein by the novel mitochondrial peptidosome, PreP. *The Journal of biological chemistry* 281, 29096-29104.
20. Dudek, J. (2017). Role of Cardiolipin in Mitochondrial Signaling Pathways. *Frontiers in cell and developmental biology* 5, 90.
21. Osman, C., Merkwirth, C., and Langer, T. (2009). Prohibitins and the functional compartmentalization of mitochondrial membranes. *Journal of cell science* 122, 3823-3830.
22. Sengers, R.C., Trijbels, J.M., Willems, J.L., Daniels, O., and Stadhouders, A.M. (1975). Congenital cataract and mitochondrial myopathy of skeletal and heart muscle associated with lactic acidosis after exercise. *The Journal of pediatrics* 86, 873-880.

### **Conditions linked to rare genetic defects in mitochondrial import machinery or its clients.**

1. Pathological genetic variation affecting the TIM and OXA complexes
  2. The special case of 3-MGA-uria<sup>23-30</sup>
23. Su, B., and Ryan, R.O. (2014). Metabolic biology of 3-methylglutaconic acid-uria: a new perspective. *Journal of inherited metabolic disease* 37, 359-368.
  24. Claypool, S.M., and Koehler, C.M. (2012). The complexity of cardiolipin in health and disease. *Trends in biochemical sciences* 37, 32-41.
  25. Wortmann, S.B., Vaz, F.M., Gardeitchik, T., Vissers, L.E., Renkema, G.H., Schuurs-Hoeijmakers, J.H., Kulik, W., Lammens, M., Christin, C., Kluijtmans, L.A., et al. (2012). Mutations in the phospholipid remodeling gene SERAC1 impair mitochondrial function and intracellular cholesterol trafficking and cause dystonia and deafness. *Nature genetics* 44, 797-802.
  26. Richter-Dennerlein, R., Korwitz, A., Haag, M., Tatsuta, T., Dargazanli, S., Baker, M., Decker, T., Lamkemeyer, T., Rugarli, E.I., and Langer, T. (2014). DNAJC19, a mitochondrial cochaperone associated with cardiomyopathy, forms a complex with prohibitins to regulate cardiolipin remodeling. *Cell metabolism* 20, 158-171.

27. Malhotra, K., Modak, A., Nangia, S., Daman, T.H., Günsel, U., Robinson, V.L., Mokranjac, D., May, E.R., and Alder, N.N. (2017). Cardiolipin mediates membrane and channel interactions of the mitochondrial TIM23 protein import complex receptor Tim50. *Science advances* 3, e1700532.
28. Kovacs-Nagy, R., Morin, G., Nouri, M.A., Brandau, O., Saadi, N.W., Nouri, M.A., van den Broek, F., Prokisch, H., Mayr, J.A., and Wortmann, S.B. (2018). HTRA2 Defect: A Recognizable Inborn Error of Metabolism with 3-Methylglutaconic Aciduria as Discriminating Feature Characterized by Neonatal Movement Disorder and Epilepsy-Report of 11 Patients. *Neuropediatrics*.
29. Liu, R., and Chan, D.C. (2017). OPA1 and cardiolipin team up for mitochondrial fusion. *Nature cell biology* 19, 760-762.
30. Mayr, J.A., Haack, T.B., Graf, E., Zimmermann, F.A., Wieland, T., Haberberger, B., Superti-Furga, A., Kirschner, J., Steinmann, B., Baumgartner, M.R., et al. (2012). Lack of the mitochondrial protein acylglycerol kinase causes Sengers syndrome. *American journal of human genetics* 90, 314-320.

### 3. Pathological genetic variation in the MIA pathway <sup>31-34</sup>

31. Chia, R., Chio, A., and Traynor, B.J. (2018). Novel genes associated with amyotrophic lateral sclerosis: diagnostic and clinical implications. *The Lancet Neurology* 17, 94-102.
32. Modjtahedi, N., Tokatlidis, K., Dessen, P., and Kroemer, G. (2016). Mitochondrial Proteins Containing Coiled-Coil-Helix-Coiled-Coil-Helix (CHCH) Domains in Health and Disease. *Trends in biochemical sciences* 41, 245-260.
33. Schorr, S., and van der Laan, M. (2018). Integrative functions of the mitochondrial contact site and cristae organizing system. *Seminars in cell & developmental biology* 76, 191-200.
34. Daithankar, V.N., Schaefer, S.A., Dong, M., Bahnsen, B.J., and Thorpe, C. (2010). Structure of the human sulfhydryl oxidase augments liver regeneration and characterization of a human mutation causing an autosomal recessive myopathy. *Biochemistry* 49, 6737-6745.

### 4. Pathological genetic variation affecting the MTS <sup>35-37</sup>

35. Patel, K.P., O'Brien, T.W., Subramony, S.H., Shuster, J., and Stacpoole, P.W. (2012). The spectrum of pyruvate dehydrogenase complex deficiency: clinical, biochemical and genetic features in 371 patients. *Molecular genetics and metabolism* 105, 34-43.
36. Rosenblum, J.S., Gilula, N.B., and Lerner, R.A. (1996). On signal sequence polymorphisms and diseases of distribution. *Proceedings of the National Academy of Sciences of the United States of America* 93, 4471-4473.
37. Lek, M., Karczewski, K.J., Minikel, E.V., Samocha, K.E., Banks, E., Fennell, T., O'Donnell-Luria, A.H., Ware, J.S., Hill, A.J., Cummings, B.B., et al. (2016). Analysis of protein-coding genetic variation in 60,706 humans. *Nature* 536, 285-291.

### 5. Pathological genetic variation affecting mitochondrial proteases <sup>38-43</sup>

38. Bagli, E., Zikou, A.K., Agnantis, N., and Kitsos, G. (2017). Mitochondrial Membrane Dynamics and Inherited Optic Neuropathies. *In vivo (Athens, Greece)* 31, 511-525.
39. Gaier, E.D., Boudreault, K., Nakata, I., Janessian, M., Skidd, P., DelBono, E., Allen, K.F., Pasquale, L.R., Place, E., Cestari, D.M., et al. (2017). Diagnostic genetic testing for patients with bilateral optic neuropathy and comparison of clinical features according to OPA1 mutation status. *Molecular vision* 23, 548-560.
40. Strauss, K.A., Jinks, R.N., Puffenberger, E.G., Venkatesh, S., Singh, K., Cheng, I., Mikita, N., Thilagavathi, J., Lee, J., Sarafianos, S., et al. (2015). CODAS syndrome is associated with

- mutations of LONP1, encoding mitochondrial AAA+ Lon protease. *American journal of human genetics* 96, 121-135.
41. Rampello, A.J., and Glynn, S.E. (2017). Identification of a Degradation Signal Sequence within Substrates of the Mitochondrial i-AAA Protease. *Journal of molecular biology* 429, 873-885.
  42. Ding, B., Martin, D.W., Rampello, A.J., and Glynn, S.E. (2018). Dissecting Substrate Specificities of the Mitochondrial AFG3L2 Protease. *Biochemistry* 57, 4225-4235.
  43. Gersch, M., Stahl, M., Poreba, M., Dahmen, M., Dziedzic, A., Drag, M., and Sieber, S.A. (2016). Barrel-shaped ClpP Proteases Display Attenuated Cleavage Specificities. *ACS chemical biology* 11, 389-399.

#### **Rare pathologic genetic variations leading to protein mistargeting to the mitochondria** <sup>44-</sup>

50

44. Kunze, M., and Berger, J. (2015). The similarity between N-terminal targeting signals for protein import into different organelles and its evolutionary relevance. *Frontiers in physiology* 6, 259.
45. Montioli, R., Fargue, S., Lewin, J., Zamparelli, C., Danpure, C.J., Borri Voltattorni, C., and Cellini, B. (2012). The N-terminal extension is essential for the formation of the active dimeric structure of liver peroxisomal alanine:glyoxylate aminotransferase. *The international journal of biochemistry & cell biology* 44, 536-546.
46. Nakai, M., Endo, T., Hase, T., and Matsubara, H. (1993). Intramitochondrial protein sorting. Isolation and characterization of the yeast MSP1 gene which belongs to a novel family of putative ATPases. *The Journal of biological chemistry* 268, 24262-24269.
47. Wolf, N.I., Zschocke, J., Jakobs, C., Rating, D., and Hoffmann, G.F. (2018). ATAD1 encephalopathy and stiff baby syndrome: a recognizable clinical presentation. *Brain : a journal of neurology* 141, e49.
48. Ren, H., Fu, K., Mu, C., Zhen, X., and Wang, G. (2012). L166P mutant DJ-1 promotes cell death by dissociating Bax from mitochondrial Bcl-XL. *Molecular neurodegeneration* 7, 40.
49. Chen, Y.C., Umanah, G.K., Dephoure, N., Andrabi, S.A., Gygi, S.P., Dawson, T.M., Dawson, V.L., and Rutter, J. (2014). Msp1/ATAD1 maintains mitochondrial function by facilitating the degradation of mislocalized tail-anchored proteins. *The EMBO journal* 33, 1548-1564.
50. Purdue, P.E., Allsop, J., Isaya, G., Rosenberg, L.E., and Danpure, C.J. (1991). Mistargeting of peroxisomal L-alanine:glyoxylate aminotransferase to mitochondria in primary hyperoxaluria patients depends upon activation of a cryptic mitochondrial targeting sequence by a point mutation. *Proceedings of the National Academy of Sciences of the United States of America* 88, 10900-10904.

#### **Deregulated mitochondrial import in cancer** <sup>51-58</sup>

51. Vander Heiden, M.G., Cantley, L.C., and Thompson, C.B. (2009). Understanding the Warburg effect: the metabolic requirements of cell proliferation. *Science (New York, NY)* 324, 1029-1033.
52. Madamba, S.M., Damri, K.N., Dejean, L.M., and Peixoto, P.M. (2015). Mitochondrial Ion Channels in Cancer Transformation. *Frontiers in oncology* 5, 120.
53. Sotgia, F., Whitaker-Menezes, D., Martinez-Outschoorn, U.E., Salem, A.F., Tsirigos, A., Lamb, R., Sneddon, S., Hult, J., Howell, A., and Lisanti, M.P. (2012). Mitochondria "fuel" breast cancer metabolism: fifteen markers of mitochondrial biogenesis label epithelial cancer cells, but are excluded from adjacent stromal cells. *Cell cycle (Georgetown, Tex)* 11, 4390-4401.



54. Yang, J., Staples, O., Thomas, L.W., Briston, T., Robson, M., Poon, E., Simoes, M.L., El-Emir, E., Buffa, F.M., Ahmed, A., et al. (2012). Human CHCHD4 mitochondrial proteins regulate cellular oxygen consumption rate and metabolism and provide a critical role in hypoxia signaling and tumor progression. *The Journal of clinical investigation* 122, 600-611.
55. Chatre, L., Fernandes, J., Michel, V., Fiette, L., Ave, P., Arena, G., Jain, U., Haas, R., Wang, T.C., Ricchetti, M., et al. (2017). Helicobacter pylori targets mitochondrial import and components of mitochondrial DNA replication machinery through an alternative VacA-dependent and a VacA-independent mechanisms. *Scientific reports* 7, 15901.
56. Arena, G., Cisse, M.Y., Pyrdziak, S., Chatre, L., Riscal, R., Fuentes, M., Arnold, J.J., Kastner, M., Gayte, L., Bertrand-Gaday, C., et al. (2018). Mitochondrial MDM2 Regulates Respiratory Complex I Activity Independently of p53. *Molecular cell* 69, 594-609.e598.
57. Quiros, P.M., Espanol, Y., Acin-Perez, R., Rodriguez, F., Barcena, C., Watanabe, K., Calvo, E., Loureiro, M., Fernandez-Garcia, M.S., Fueyo, A., et al. (2014). ATP-dependent Lon protease controls tumor bioenergetics by reprogramming mitochondrial activity. *Cell reports* 8, 542-556.
58. Luo, B., Wang, M., Hou, N., Hu, X., Jia, G., Qin, X., Zuo, X., Liu, Y., Luo, K., Song, W., et al. (2016). ATP-Dependent Lon Protease Contributes to Helicobacter pylori-Induced Gastric Carcinogenesis. *Neoplasia (New York, NY)* 18, 242-252.

### **Diagnosis and potential implications of altered mitochondrial import and targeting** <sup>37; 59-71</sup>

37. Lek, M., Karczewski, K.J., Minikel, E.V., Samocha, K.E., Banks, E., Fennell, T., O'Donnell-Luria, A.H., Ware, J.S., Hill, A.J., Cummings, B.B., et al. (2016). Analysis of protein-coding genetic variation in 60,706 humans. *Nature* 536, 285-291.
59. Allot, A., Peng, Y., Wei, C.H., Lee, K., Phan, L., and Lu, Z. (2018). LitVar: a semantic search engine for linking genomic variant data in PubMed and PMC. *Nucleic acids research* 46, W530-w536.
60. Bentley, A.R., Callier, S., and Rotimi, C.N. (2017). Diversity and inclusion in genomic research: why the uneven progress? *Journal of community genetics* 8, 255-266.
61. Falk, M.J., Shen, L., Gonzalez, M., Leipzig, J., Lott, M.T., Stassen, A.P., Diroma, M.A., Navarro-Gomez, D., Yeske, P., Bai, R., et al. (2015). Mitochondrial Disease Sequence Data Resource (MSeqDR): a global grass-roots consortium to facilitate deposition, curation, annotation, and integrated analysis of genomic data for the mitochondrial disease clinical and research communities. *Molecular genetics and metabolism* 114, 388-396.
62. Hirano, M., Emmanuele, V., and Quinzii, C.M. (2018). Emerging therapies for mitochondrial diseases. *Essays in biochemistry* 62, 467-481.
63. Kenney, M.C., Chwa, M., Atilano, S.R., Falatoonzadeh, P., Ramirez, C., Malik, D., Tarek, M., Del Carpio, J.C., Nesburn, A.B., Boyer, D.S., et al. (2014). Molecular and bioenergetic differences between cells with African versus European inherited mitochondrial DNA haplogroups: implications for population susceptibility to diseases. *Biochimica et biophysica acta* 1842, 208-219.
64. Landrum, M.J., Lee, J.M., Riley, G.R., Jang, W., Rubinstein, W.S., Church, D.M., and Maglott, D.R. (2014). ClinVar: public archive of relationships among sequence variation and human phenotype. *Nucleic acids research* 42, D980-985.
65. Nambot, S., Gavrillov, D., Thevenon, J., Bruel, A.L., Bainbridge, M., Rio, M., Goizet, C., Rotig, A., Jaeken, J., Niu, N., et al. (2017). Further delineation of a rare recessive encephalomyopathy linked to mutations in GFER thanks to data sharing of whole exome sequencing data. *Clinical genetics* 92, 188-198.

66. Nurminen, A., Farnum, G.A., and Kaguni, L.S. (2017). Pathogenicity in POLG syndromes: DNA polymerase gamma pathogenicity prediction server and database. *BBA clinical* 7, 147-156.
67. Petrovski, S., and Goldstein, D.B. (2016). Unequal representation of genetic variation across ancestry groups creates healthcare inequality in the application of precision medicine. *Genome biology* 17, 157.
68. Vrbacky, M., Kovalcikova, J., Chawengsaksophak, K., Beck, I.M., Mracek, T., Nuskova, H., Sedmera, D., Papousek, F., Kolar, F., Sobol, M., et al. (2016). Knockout of Tmem70 alters biogenesis of ATP synthase and leads to embryonal lethality in mice. *Human molecular genetics* 25, 4674-4685.
69. Carapito, C., Kuhn, L., Karim, L., Rompais, M., Rabilloud, T., Schwenzer, H., and Sissler, M. (2017). Two proteomic methodologies for defining N-termini of mature human mitochondrial aminoacyl-tRNA synthetases. *Methods (San Diego, Calif)* 113, 111-119.
70. Zhang, C., Montooth, K.L., and Calvi, B.R. (2017). Incompatibility between mitochondrial and nuclear genomes during oogenesis results in ovarian failure and embryonic lethality. *Development (Cambridge, England)* 144, 2490-2503.
71. Crawford, N., Prendergast, D., Oehlert, J.W., Shaw, G.M., Stevenson, D.K., Rappaport, N., Sirota, M., Tishkoff, S.A., and Sondheimer, N. (2018). Divergent Patterns of Mitochondrial and Nuclear Ancestry Are Associated with the Risk for Preterm Birth. *The Journal of pediatrics* 194, 40-46.e44.

#### References for Supplemental Table 1 <sup>72-74</sup>

72. Thompson, K., Mai, N., Olahova, M., Scialo, F., Formosa, L.E., Stroud, D.A., Garrett, M., Lax, N.Z., Robertson, F.M., Jou, C., et al. (2018). OXA1L mutations cause mitochondrial encephalopathy and a combined oxidative phosphorylation defect. *EMBO molecular medicine*.
73. Pacheu-Grau, D., Callegari, S., Emperador, S., Thompson, K., Aich, A., Topol, S.E., Spencer, E.G., McFarland, R., Ruiz-Pesini, E., Torkamani, A., et al. (2018). Mutations of the mitochondrial carrier translocase channel subunit TIM22 cause early-onset mitochondrial myopathy. *Human molecular genetics* 27, 4135-4144.
74. Brunetti, D., Torsvik, J., Dallabona, C., Teixeira, P., Sztromwasser, P., Fernandez-Vizarra, E., Cerutti, R., Reyes, A., Preziuso, C., D'Amati, G., et al. (2016). Defective PITRM1 mitochondrial peptidase is associated with Abeta amyloidotic neurodegeneration. *EMBO molecular medicine* 8, 176-190.

#### References for Supplemental Table 2 <sup>30 75-79</sup>

30. Mayr, J.A., Haack, T.B., Graf, E., Zimmermann, F.A., Wieland, T., Haberberger, B., Superti-Furga, A., Kirschner, J., Steinmann, B., Baumgartner, M.R., et al. (2012). Lack of the mitochondrial protein acylglycerol kinase causes Sengers syndrome. *American journal of human genetics* 90, 314-320.
75. Mayr, J.A., Havlickova, V., Zimmermann, F., Magler, I., Kaplanova, V., Jesina, P., Pecinova, A., Nuskova, H., Koch, J., Sperl, W., et al. (2010). Mitochondrial ATP synthase deficiency due to a mutation in the ATP5E gene for the F1 epsilon subunit. *Human molecular genetics* 19, 3430-3439.

76. De Meirleir, L., Seneca, S., Lissens, W., De Clercq, I., Eyskens, F., Gerlo, E., Smet, J., and Van Coster, R. (2004). Respiratory chain complex V deficiency due to a mutation in the assembly gene ATP12. *Journal of medical genetics* 41, 120-124.
77. Olahova, M., Yoon, W.H., Thompson, K., Jangam, S., Fernandez, L., Davidson, J.M., Kyle, J.E., Grove, M.E., Fisk, D.G., Kohler, J.N., et al. (2018). Biallelic Mutations in ATP5F1D, which Encodes a Subunit of ATP Synthase, Cause a Metabolic Disorder. *American journal of human genetics* 102, 494-504.
78. Spiegel, R., Khayat, M., Shalev, S.A., Horovitz, Y., Mandel, H., Hershkovitz, E., Barghuti, F., Shaag, A., Saada, A., Korman, S.H., et al. (2011). TMEM70 mutations are a common cause of nuclear encoded ATP synthase assembly defect: further delineation of a new syndrome. *Journal of medical genetics* 48, 177-182.
79. Guarani, V., Jardel, C., Chretien, D., Lombes, A., Benit, P., Labasse, C., Lacene, E., Bourillon, A., Imbard, A., Benoist, J.F., et al. (2016). QIL1 mutation causes MICOS disassembly and early onset fatal mitochondrial encephalopathy with liver disease. *eLife* 5.
